# Supplementary material
Source: ML conference proceedings conference paper supplement (https://proceedings.mlr.press/v139/pentyala21a.html)
Supplement: Supplementary file 2 [file pentyala21a-supp.zip]

## A. Architecture of the ConvNet Model Used

We use the architecture shown in Figure A.1 to train *Bob's* image classification model. The number of parameters to be learned for each layer is shown in Figure A.2. While training the model, each fully connected (FC) layer is separated by a dropout layer. We use Softmax as the activation for the last FC layer for training and use approximated Softmax for inference in-the-clear as well as private inference.

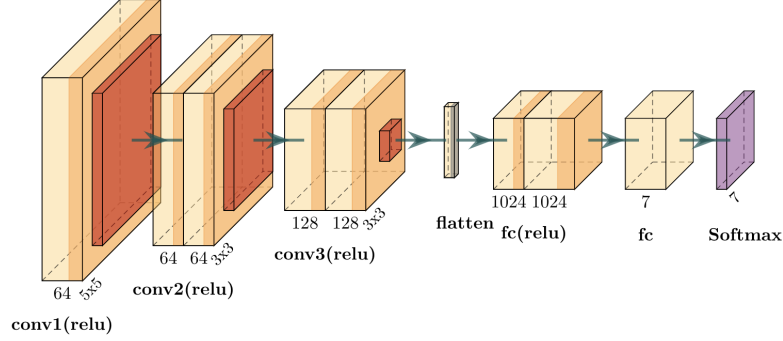

Figure A.1. Diagram of ConvNet architecture for frame classification

| Layer (type)                 | Output Shape       | Param # |
|------------------------------|--------------------|---------|
| conv2d (Conv2D)              | (None, 44, 44, 64) | 1664    |
| average_pooling2d (AveragePo | (None, 20, 20, 64) | 0       |
| conv2d_1 (Conv2D)            | (None, 18, 18, 64) | 36928   |
| conv2d_2 (Conv2D)            | (None, 16, 16, 64) | 36928   |
| average_pooling2d_1 (Average | (None, 7, 7, 64)   | 0       |
| conv2d_3 (Conv2D)            | (None, 5, 5, 128)  | 73856   |
| conv2d_4 (Conv2D)            | (None, 3, 3, 128)  | 147584  |
| average_pooling2d_2 (Average | (None, 1, 1, 128)  | 0       |
| flatten (Flatten)            | (None, 128)        | 0       |
| dense (Dense)                | (None, 1024)       | 132096  |
| dropout (Dropout)            | (None, 1024)       | 0       |
| dense_1 (Dense)              | (None, 1024)       | 1049600 |
| dropout_1 (Dropout)          | (None, 1024)       | 0       |
| dense_2 (Dense)              | (None, 7)          | 7175    |
| =====                        |                    |         |
| Total params: 1,485,831      |                    |         |
| Trainable params: 1,485,831  |                    |         |
| Non-trainable params: 0      |                    |         |

Figure A.2. Details of ConvNet architecture for frame classification

## B. Source Code

We provide our source code which includes:

- a readme file
- code for training the model in-the-clear
- code for classifying a RAVDESS video in-the-clear

- 
- code for extracting inputs for use with the open source MPC framework MP-SPDZ<sup>1</sup>
  - code for the MPC protocols implemented in MP-SPDZ

---

<sup>1</sup><https://github.com/data61/MP-SPDZ>
